# Supplementary material for: Deep Sequencing the Transcriptome Reveals Seasonal Adaptive Mechanisms in a Hibernating Mammal
Source: PLoS One. 2011 Oct 28;6(10):e27021. doi: 10.1371/journal.pone.0027021 (PMC3203946; doi:10.1371/journal.pone.0027021)
Supplement: Table S2 — Complete list of expressed genes that meet the 1.0×10−11 FDR criterion for heart, skeletal muscle, and WAT. (XLS) [file pone.0027021.s004.xls]

## Sheet: Sheet1
Uniprot gene	HGNC name	UQN Skeletal:April	UQN Skeletal:August	UQN Skeletal:October	UQN Skeletal:Torpor	UQN Skeletal:IBA	UQN Skeletal:March	UQN Heart:April	UQN Heart:August	UQN Heart:October	UQN Heart:Torpor	UQN Heart:IBA	UQN Heart:March	UQN WAT:April	UQN WAT:August	UQN WAT:October	UQN WAT:Torpor	UQN WAT:IBA	UQN WAT:March	UQN Unknown	Skeletal Muscle FDR < 10^(-11)
ZN720_HUMAN	ZNF720	1785	2204	781	813	568	3342	2029	1702	2313	1891	2737	1734	1203	1126	976	674	917	980	859	2.72832e-14
TM38A_HUMAN	TMEM38A	192	245	264	288	224	316	107	70	63	92	110	102	3	2	0	2	3	4	74	2.75535e-14
ZN420_HUMAN	ZNF420	1	1	1	1	55	4	5	5	7	3	2	2	7	1	0	2	2	3	2	2.76844e-14
UBP13_HUMAN	USP13	183	219	173	270	214	212	231	244	222	271	199	132	9	8	4	6	8	9	102	2.80976e-14
UBC_HUMAN		156	159	212	126	113	92	162	153	180	153	209	273	63	121	119	151	122	70	76	2.85233e-14
UB2V1_HUMAN	UBE2V1	91	24	15	16	12	14	90	27	24	25	24	20	17	22	35	20	17	15	14	2.89622e-14
TPM2_HUMAN	TPM2	1202	787	988	481	490	1126	8	10	8	3	7	16	41	16	9	5	8	27	142	2.94147e-14
TNNT1_HUMAN	TNNT1	208	73	115	80	117	93	29	71	37	19	20	73	0	1	0	0	0	2	30	2.98816e-14
TNNC1_HUMAN	TNNC1	105	36	26	20	56	33	222	156	197	224	228	293	0	1	1	0	0	1	44	3.03635e-14
TITIN_HUMAN	TTN	1407	2373	2381	1790	1379	2573	969	1344	1247	1182	802	606	12	5	0	2	2	29	550	3.08613e-14
THIM_HUMAN	ACAA2	185	39	66	137	156	120	188	133	105	224	197	189	71	54	68	101	152	95	71	3.13757e-14
TFR1_HUMAN	TFRC	6	120	62	8	7	33	67	55	67	88	64	8	5	6	17	8	8	4	12	3.19075e-14
TELT_HUMAN	TCAP	268	394	339	311	257	283	486	892	353	329	350	1758	0	5	0	0	5	7	172	3.24576e-14
SMAD3_HUMAN	SMAD3	374	147	186	169	143	283	739	372	764	761	535	793	60	43	52	40	35	41	176	3.3027e-14
SELS_HUMAN		162	208	99	67	56	373	153	198	191	152	267	125	109	127	91	53	72	120	80	3.36168e-14
SARCO_HUMAN	SLN	262	25	50	29	30	105	11	32	7	8	11	15	1	0	0	0	0	0	13	3.4228e-14
RS15_HUMAN	RPS15	14	7	10	10	52	4	8	9	5	4	14	10	17	16	24	26	18	28	4	3.48619e-14
QCR1_HUMAN	UQCRC1	76	64	104	104	118	53	162	111	128	120	168	166	24	16	40	21	35	17	36	3.55196e-14
AT1A2_HUMAN	ATP1A2	187	222	243	278	221	353	18	24	16	20	14	18	57	14	16	27	22	92	81	3.61804e-14
PDLI3_HUMAN	PDLIM3	171	251	136	198	185	152	8	15	13	17	14	13	9	8	3	0	2	7	50	3.62027e-14
PDK4_HUMAN	PDK4	226	275	135	558	471	391	186	355	88	705	533	426	52	105	77	239	329	274	219	3.69125e-14
NU6M_HUMAN	MT-ND6	2414	1821	838	803	826	1980	5551	5024	6413	6591	4250	3794	525	480	145	184	208	212	1091	3.76508e-14
NU2M_HUMAN	MT-ND2	4626	2377	986	904	1046	2809	7165	6943	10531	8064	5643	10215	529	569	225	120	222	189	1560	3.84192e-14
NRAP_HUMAN	NRAP	375	264	276	442	404	407	278	242	246	318	340	322	1	0	3	0	1	3	114	3.92196e-14
NF2L1_HUMAN	NFE2L1	165	151	156	262	178	153	503	387	322	424	420	348	73	74	79	82	103	67	121	4.0054e-14
NEBU_HUMAN	NEB	941	1202	1333	1373	1173	1684	4	2	5	2	0	2	5	0	0	0	0	13	218	4.09248e-14
AT5G2_HUMAN	ATP5G2	71	8	7	10	12	22	93	24	65	111	58	57	20	6	3	2	7	6	14	4.16916e-14
NDRG2_HUMAN	NDRG2	241	528	489	792	747	685	141	237	171	216	182	271	59	78	133	98	78	88	153	4.18342e-14
ADT1_HUMAN	SLC25A4	321	318	374	378	331	454	688	568	480	679	728	848	5	6	4	5	2	12	197	4.2492e-14
MYPC2_HUMAN	MYBPC2	523	415	202	187	117	542	0	0	1	1	0	0	1	0	0	0	0	9	76	4.2785e-14
MYPC1_HUMAN	MYBPC1	404	808	709	465	371	625	1	3	2	2	4	0	3	0	1	0	0	6	95	4.378e-14
MYOME_HUMAN	PDE4DIP	304	467	469	443	355	636	245	261	242	257	200	119	9	15	7	12	12	12	114	4.48224e-14
MYH6_HUMAN	MYH6	498	150	105	76	59	144	5686	7415	9733	14863	14163	14796	76	45	25	14	17	21	2166	4.59156e-14
MYH4_HUMAN	MYH4	3731	5482	1442	1847	2025	5831	40	4	46	58	30	3	29	1	0	9	1	31	670	4.70635e-14
MYH2_HUMAN	MYH2	975	819	1020	458	360	930	1	0	1	1	2	7	1	2	5	3	1	16	140	4.82703e-14
MYH1_HUMAN	MYH1	1903	4675	6683	4642	3416	6756	71	37	48	178	56	106	11	3	5	6	5	81	1001	4.95405e-14
MYBPH_HUMAN	MYBPH	107	97	129	274	225	77	0	0	0	0	0	0	7	0	0	0	0	0	20	5.08795e-14
MLTK_HUMAN		136	176	176	253	175	222	142	166	147	172	109	59	27	18	20	9	16	27	61	5.22928e-14
MLRV_HUMAN	MYL2	326	159	155	109	140	152	2071	1399	1712	1327	1495	2629	13	25	25	12	14	9	355	5.37869e-14
MBTP1_HUMAN	MBTPS1	103	7	14	14	19	6	126	19	65	35	96	5	33	20	24	20	27	24	12	5.53688e-14
MAP4_HUMAN	MAP4	155	175	158	307	201	264	141	124	73	92	76	65	47	107	80	67	62	87	63	5.70467e-14
LMOD2_HUMAN	LMOD2	105	87	114	213	142	95	198	196	138	181	178	250	0	0	0	0	1	2	58	5.88294e-14
LDHA_HUMAN	LDHA	306	330	248	130	137	389	20	12	9	16	19	8	16	35	44	43	22	36	62	6.07271e-14
LDB3_HUMAN	LDB3	311	265	214	105	62	381	493	512	487	561	550	655	0	6	0	2	2	5	151	6.27513e-14
KLH31_HUMAN	KLHL31	114	158	66	75	39	210	216	278	217	269	189	52	1	2	0	0	0	3	50	6.49152e-14
KCRS_HUMAN	CKMT2	234	150	165	72	46	145	229	209	153	192	158	232	0	0	0	0	0	1	59	6.72336e-14
HSPB7_HUMAN	HSPB7	157	180	135	222	176	117	347	411	417	450	507	609	3	10	7	5	5	4	118	6.97237e-14
HS90B_HUMAN	HSP90AB1	386	286	300	405	302	294	242	268	226	272	216	223	139	128	108	91	120	137	99	7.24054e-14
HMCS2_HUMAN	HMGCS2	44	9	12	65	56	33	3	3	1	12	17	23	51	52	147	142	197	141	25	7.53016e-14
GLNA_HUMAN	GLUL	241	175	68	77	45	69	128	139	101	62	67	36	323	206	297	248	245	273	86	7.84392e-14
FHL1_HUMAN	FHL1	243	418	365	284	273	287	76	42	40	116	82	75	71	196	397	258	295	167	92	8.18496e-14
FBX32_HUMAN	FBXO32	65	77	94	168	111	50	53	59	61	122	86	42	11	8	0	0	2	7	18	8.557e-14
EF1A2_HUMAN	EEF1A2	580	340	244	257	237	527	230	196	133	205	233	421	7	1	0	2	3	4	136	8.96448e-14
ECHA_HUMAN	HADHA	83	78	120	154	162	165	248	276	242	462	360	423	29	48	81	90	106	53	112	9.4127e-14
DDB1_HUMAN	DDB1	158	119	192	183	181	134	298	295	238	310	345	528	51	38	53	75	82	56	106	9.90811e-14
DCBD2_HUMAN	DCBLD2	5	30	5	9	10	98	90	131	86	107	84	361	13	53	36	29	24	29	32	1.04586e-13
IGFN1_HUMAN	IGFN1	5	6	10	17	43	11	0	0	0	0	0	0	3	0	0	0	1	3	1	1.08662e-13
DBPA_HUMAN	CSDA	581	522	568	742	623	619	95	65	54	50	53	73	33	18	37	58	30	22	88	1.10738e-13
CYB_HUMAN	MT-CYB	2676	2209	677	825	631	2089	4495	5444	4851	4967	3074	7269	408	587	161	119	203	227	1137	1.17659e-13
COX2_HUMAN	MT-CO2	1079	491	286	414	322	865	2115	1578	1851	2239	1491	3534	124	116	87	49	41	106	458	1.25503e-13
COX1_HUMAN	MT-CO1	8061	4692	2643	2345	2119	5710	20595	16901	17440	17475	13695	14981	1252	1306	824	288	390	815	3515	1.34467e-13
TMED2_HUMAN	TMED2	29	100	17	31	39	79	54	47	44	70	41	34	28	20	36	18	21	25	30	1.39422e-13
CCD69_HUMAN	CCDC69	85	157	165	86	72	103	63	64	62	75	84	93	32	83	69	64	70	41	49	1.44811e-13
CASQ1_HUMAN	CASQ1	198	286	318	214	183	399	5	2	0	0	0	3	0	0	3	0	0	5	58	1.56878e-13
CAH3_HUMAN	CA3	223	267	154	56	51	189	5	3	3	1	1	5	1056	666	679	546	710	1335	201	1.7114e-13
ATP8_HUMAN	MT-ATP8	306	62	54	30	71	61	251	201	514	145	161	93	41	16	8	6	10	8	61	1.88254e-13
ATP6_HUMAN	MT-ATP6	8021	3244	993	928	1112	3657	10063	9296	14824	8765	7718	10923	1033	840	292	139	201	537	1979	2.09171e-13
GPDA_HUMAN	GPD1	57	100	57	56	30	171	9	31	16	14	15	18	285	599	568	419	462	339	102	2.3498e-13
AT2A2_HUMAN	ATP2A2	332	186	275	395	247	406	1628	1656	1590	2877	2347	1199	49	35	24	29	35	49	435	2.35317e-13
ASB2_HUMAN	ASB2	39	103	141	96	64	46	205	223	238	285	294	375	3	39	57	44	47	9	66	2.68934e-13
COX3_HUMAN	MT-CO3	2055	1156	805	800	763	1214	2838	3907	3267	3012	2455	4050	275	261	195	58	120	150	801	2.80047e-13
AMOL1_HUMAN	AMOTL1	68	40	59	114	78	196	12	21	13	16	12	7	37	19	5	11	19	23	23	3.13757e-13
AL1A2_HUMAN	ALDH1A2	50	2	1	0	3	1	60	4	17	7	18	0	7	8	7	11	11	5	11	3.76508e-13
RS2_HUMAN	RPS2	79	45	87	114	103	96	111	75	69	95	117	132	85	82	145	84	98	91	55	4.3531e-13
ADCK3_HUMAN	CABC1	151	129	166	236	189	162	67	79	58	142	137	203	8	9	3	6	5	17	50	4.70635e-13
ACTN3_HUMAN	ACTN3	1094	981	397	165	116	739	1	1	2	0	1	2	13	3	0	0	0	7	120	6.27513e-13
TRI63_HUMAN	TRIM63	74	82	52	53	35	15	58	91	46	61	41	76	5	0	0	2	1	5	29	7.58215e-13
ACTN2_HUMAN	ACTN2	883	657	895	1075	868	979	675	659	584	736	733	691	1	0	0	0	0	8	276	9.4127e-13
KPYM_HUMAN	PKM2	322	347	222	225	162	523	203	258	146	271	241	483	31	31	51	38	33	42	138	1.00545e-12
CQ10A_HUMAN	COQ10A	55	44	85	28	72	43	35	21	24	30	31	34	4	3	4	5	4	6	6	1.1198e-12
CO1A1_HUMAN	COL1A1	4	36	2	0	6	3	17	61	9	23	32	10	72	253	176	134	200	216	44	1.19381e-12
UCP3_HUMAN	UCP3	26	13	25	60	53	64	9	1	10	25	14	16	0	0	0	0	0	0	8	1.55057e-12
XIRP2_HUMAN	XIRP2	250	120	161	237	181	254	144	107	76	73	51	54	0	0	0	0	0	1	45	1.5698e-12
ACSL1_HUMAN	ACSL1	72	100	144	122	110	172	84	145	153	232	183	85	149	214	264	111	162	88	83	1.83623e-12
GPX3_HUMAN	GPX3	11	12	16	42	36	9	47	32	35	19	17	50	31	13	33	18	36	27	13	1.86861e-12
ACTC_HUMAN	ACTC1	291	61	111	100	110	90	2628	2264	2366	2270	2295	3476	24	9	7	6	9	9	457	1.88254e-12
NU1M_HUMAN	MT-ND1	2596	2420	1133	1243	987	2687	3512	5548	4548	4019	3095	8219	355	404	121	158	161	241	1050	1.98581e-12
EF2_HUMAN	EEF2	304	296	262	350	313	501	311	294	248	258	271	262	293	211	287	221	287	342	183	2.42999e-12
S27A1_HUMAN	SLC27A1	39	59	48	92	74	47	12	27	15	38	47	73	11	4	8	5	15	23	8	2.51326e-12
F16P2_HUMAN	FBP2	15	31	15	53	45	77	0	0	0	0	2	0	0	0	0	6	1	1	7	3.7841e-12
CMYA5_HUMAN	CMYA5	459	528	534	662	446	709	469	378	479	547	370	167	7	0	0	0	0	5	179	6.36133e-12
BASI_HUMAN	BSG	26	29	53	58	72	61	146	169	147	164	223	392	37	75	108	69	60	46	61	8.89649e-12

## Sheet: Sheet2
Uniprot gene	HGNC name	UQN Skeletal:April	UQN Skeletal:August	UQN Skeletal:October	UQN Skeletal:Torpor	UQN Skeletal:IBA	UQN Skeletal:March	UQN Heart:April	UQN Heart:August	UQN Heart:October	UQN Heart:Torpor	UQN Heart:IBA	UQN Heart:March	UQN WAT:April	UQN WAT:August	UQN WAT:October	UQN WAT:Torpor	UQN WAT:IBA	UQN WAT:March	UQN Unknown	Heart FDR < 10^(-11)
ZN790_HUMAN	ZNF790	0	0	0	0	0	6	0	3	0	8	32	2	0	1	0	0	0	1	0	2.18269e-14
ZN540_HUMAN	ZNF540	9	10	11	18	7	17	52	36	79	85	78	7	12	18	12	15	21	15	11	2.20308e-14
ZF106_HUMAN	ZFP106	97	61	76	92	65	146	201	141	219	179	143	42	16	19	16	14	19	30	62	2.22387e-14
XPO4_HUMAN	XPO4	15	7	10	14	4	15	119	125	92	148	104	28	3	4	4	3	8	7	24	2.24505e-14
UCP2_HUMAN	UCP2	3	0	0	3	1	3	49	16	11	48	69	119	8	6	4	5	11	20	10	2.26663e-14
UB2V1_HUMAN	UBE2V1	91	24	15	16	12	14	90	27	24	25	24	20	17	22	35	20	17	15	14	2.28864e-14
TWF2_HUMAN	TWF2	43	38	43	45	40	23	56	51	69	68	72	197	1	10	12	11	5	7	16	2.31108e-14
TNNT2_HUMAN	TNNT2	6	1	2	5	6	4	961	699	706	638	646	1329	0	1	0	3	0	0	158	2.33396e-14
TNNI3_HUMAN	TNNI3	3	0	0	1	1	0	344	322	319	177	225	520	0	0	0	0	0	0	55	2.3573e-14
TFR1_HUMAN	TFRC	6	120	62	8	7	33	67	55	67	88	64	8	5	6	17	8	8	4	12	2.38111e-14
TELT_HUMAN	TCAP	268	394	339	311	257	283	486	892	353	329	350	1758	0	5	0	0	5	7	172	2.40541e-14
SVIL_HUMAN	SVIL	143	135	130	181	120	186	142	170	113	208	149	65	13	12	13	12	6	14	53	2.43021e-14
SRCA_HUMAN	SRL	107	113	102	108	90	199	154	190	181	175	188	63	0	0	0	2	2	3	55	2.45552e-14
SRBS2_HUMAN	SORBS2	2	12	2	1	6	5	169	193	153	197	174	59	12	3	0	0	1	5	25	2.48137e-14
SPTB2_HUMAN	SPTBN1	44	29	53	44	38	76	254	306	278	350	355	117	169	243	203	277	288	222	89	2.50777e-14
DDB1_HUMAN	DDB1	158	119	192	183	181	134	298	295	238	310	345	528	51	38	53	75	82	56	106	2.51557e-14
SPDYA_HUMAN	SPDYA	22	12	10	22	14	58	107	64	64	152	72	262	7	5	4	3	0	5	26	2.53473e-14
MYOME_HUMAN	PDE4DIP	304	467	469	443	355	636	245	261	242	257	200	119	9	15	7	12	12	12	114	2.55504e-14
SELW_HUMAN	SEPW1	52	46	33	27	38	59	23	29	11	26	35	109	13	17	5	2	8	15	17	2.56228e-14
SELS_HUMAN		162	208	99	67	56	373	153	198	191	152	267	125	109	127	91	53	72	120	80	2.59044e-14
SCOT1_HUMAN	OXCT1	23	18	6	2	3	10	225	297	240	186	147	68	19	19	8	8	3	9	51	2.61922e-14
RAB14_HUMAN	RAB14	11	48	10	16	14	40	23	138	46	37	19	120	15	26	21	5	21	23	19	2.64865e-14
QKI_HUMAN	QKI	58	85	57	58	38	64	96	107	155	167	126	52	31	67	51	61	58	49	32	2.67875e-14
PPM1K_HUMAN	PPM1K	4	4	5	3	0	1	63	72	73	18	14	15	11	9	1	0	2	7	6	2.70954e-14
PPIG_HUMAN	PPIG	7	4	4	10	4	6	16	20	83	44	28	10	15	16	9	15	7	7	4	2.74105e-14
PP1B_HUMAN	PPP1CB	115	98	87	95	71	105	194	186	178	184	162	72	44	39	64	46	50	72	39	2.77329e-14
PP14C_HUMAN	PPP1R14C	54	24	42	52	48	39	160	71	92	81	102	41	3	5	7	2	3	0	25	2.80631e-14
FRIH_HUMAN	FTH1	114	71	42	39	36	61	323	248	277	218	197	436	327	285	235	294	232	273	99	2.80714e-14
PLPL2_HUMAN	PNPLA2	115	117	120	175	143	191	172	191	173	273	264	723	259	511	813	628	693	288	168	2.84012e-14
PLAK_HUMAN	JUP	3	8	9	10	20	11	103	150	114	229	292	263	13	14	9	14	12	19	44	2.87476e-14
PDK4_HUMAN	PDK4	226	275	135	558	471	391	186	355	88	705	533	426	52	105	77	239	329	274	219	2.91025e-14
PCMD1_HUMAN	PCMTD1	36	66	20	26	25	49	44	195	36	38	30	94	17	20	9	9	9	28	24	2.94662e-14
PARM1_HUMAN	PARM1	2	0	2	0	0	2	214	193	181	342	332	122	5	2	4	2	3	3	42	2.98392e-14
ODPA_HUMAN	PDHA1	160	106	84	88	68	129	190	182	170	237	225	94	32	38	39	26	24	23	65	3.02218e-14
NUCKS_HUMAN	NUCKS1	99	65	103	109	75	89	184	96	138	159	126	65	56	40	40	26	31	39	50	3.06143e-14
NU4LM_HUMAN	MT-ND4L	88	35	17	23	27	32	160	92	293	211	167	36	15	12	4	3	6	15	36	3.10171e-14
NU1M_HUMAN	MT-ND1	2596	2420	1133	1243	987	2687	3512	5548	4548	4019	3095	8219	355	404	121	158	161	241	1050	3.14307e-14
NRIP3_HUMAN	NRIP3	196	66	95	93	81	103	423	222	614	917	436	366	33	25	15	23	21	14	78	3.18554e-14
NOLC1_HUMAN	NOLC1	78	69	46	43	38	53	87	141	186	71	104	62	23	15	29	17	30	14	25	3.22918e-14
NNTM_HUMAN	NNT	107	85	87	58	35	111	349	363	299	362	288	146	16	38	25	18	21	25	75	3.27403e-14
NEBL_HUMAN	NEBL	0	0	0	0	0	0	147	155	132	131	85	29	0	2	0	5	2	1	18	3.32014e-14
NAC1_HUMAN	SLC8A1	2	0	2	0	0	1	318	368	408	861	665	164	11	4	0	5	2	3	88	3.36757e-14
MYOZ2_HUMAN	MYOZ2	17	10	7	16	7	14	86	86	80	60	58	182	3	1	0	2	0	0	15	3.41638e-14
MYL9_HUMAN	MYL9	4	4	1	0	0	4	122	95	49	50	60	182	7	27	33	11	13	16	24	3.46662e-14
MYL3_HUMAN	MYL3	99	75	78	65	35	77	666	691	495	637	729	1718	0	0	0	0	1	1	166	3.51836e-14
MYH7_HUMAN	MYH7	1392	827	1097	1116	844	1567	7124	6864	4130	2755	2743	4071	9	9	1	2	2	15	1202	3.57167e-14
MYH4_HUMAN	MYH4	3731	5482	1442	1847	2025	5831	40	4	46	58	30	3	29	1	0	9	1	31	670	3.62662e-14
MYH1_HUMAN	MYH1	1903	4675	6683	4642	3416	6756	71	37	48	178	56	106	11	3	5	6	5	81	1001	3.68328e-14
MYG_HUMAN	MB	679	703	678	574	547	628	1233	1582	1172	1191	1738	3523	4	0	1	0	0	9	398	3.74175e-14
MURC_HUMAN	MURC	48	38	15	26	29	92	4	12	5	28	8	62	1	2	0	0	0	2	18	3.8021e-14
SPON1_HUMAN	SPON1	1	1	0	1	0	1	16	30	34	65	64	10	11	13	15	11	14	15	6	3.85644e-14
MO4L2_HUMAN	MORF4L2	89	39	32	81	69	90	174	140	121	333	139	163	21	41	13	24	26	32	48	3.86443e-14
MK09_HUMAN	MAPK9	61	17	21	8	7	22	150	59	155	106	95	31	21	18	9	14	6	13	22	3.92883e-14
MBTP1_HUMAN	MBTPS1	103	7	14	14	19	6	126	19	65	35	96	5	33	20	24	20	27	24	12	3.99542e-14
MAF1_HUMAN	MAF1	62	27	26	37	26	34	150	89	132	218	125	78	16	17	24	14	18	14	31	4.06431e-14
LIPP_HUMAN	PNLIP	0	0	9	0	0	1	138	114	183	224	204	306	631	52	45	50	62	107	66	4.13561e-14
LIPL_HUMAN	LPL	88	45	64	68	48	82	369	367	298	270	267	156	781	976	516	282	430	344	188	4.20946e-14
LIPB1_HUMAN	PPFIBP1	11	4	7	6	4	7	76	77	86	128	100	21	9	17	16	11	15	13	19	4.286e-14
LAMC1_HUMAN	LAMC1	14	27	10	13	17	24	70	137	82	145	108	41	75	165	121	146	152	95	41	4.36537e-14
KPYM_HUMAN	PKM2	322	347	222	225	162	523	203	258	146	271	241	483	31	31	51	38	33	42	138	4.44774e-14
KLH31_HUMAN	KLHL31	114	158	66	75	39	210	216	278	217	269	189	52	1	2	0	0	0	3	50	4.53327e-14
KCRM_HUMAN	CKM	2024	1755	1808	1050	926	2651	415	536	377	315	414	791	15	1	23	9	8	31	425	4.62216e-14
KAP0_HUMAN	PRKAR1A	29	25	24	24	26	44	224	171	189	153	161	57	48	46	44	55	62	63	41	4.7146e-14
IF4G2_HUMAN	EIF4G2	147	187	126	141	91	136	279	270	214	260	228	127	99	141	152	90	150	137	95	4.81082e-14
IF4B_HUMAN	EIF4B	207	83	78	89	88	119	200	97	239	179	255	86	187	74	128	93	119	86	93	4.91104e-14
IBP5_HUMAN	IGFBP5	34	36	11	9	10	74	97	55	22	27	26	21	240	66	79	49	49	95	35	5.01553e-14
HSPB6_HUMAN	HSPB6	394	258	248	196	205	404	702	561	494	526	574	1178	17	112	120	46	62	35	198	5.12457e-14
HSPB1_HUMAN	HSPB1	86	85	76	53	68	50	54	99	53	37	74	171	5	48	107	43	36	22	41	5.23844e-14
ANK3_HUMAN	ANK3	14	12	25	17	13	30	79	90	39	98	59	20	4	3	0	0	0	3	16	5.24845e-14
HELZ_HUMAN	HELZ	36	12	9	6	4	7	53	49	121	40	31	8	11	7	7	9	11	9	13	5.3575e-14
HBA_HUMAN	HBA2	5	3	2	3	4	7	34	37	51	12	18	112	12	9	19	5	6	17	7	5.48209e-14
H2B1C_HUMAN	HIST1H2BI	19	0	1	2	1	0	26	1	73	19	25	0	4	0	0	0	0	0	3	5.61262e-14
GPAT1_HUMAN	GPAM	25	24	30	39	30	74	32	53	70	125	113	41	3	2	5	5	3	5	24	5.74951e-14
GLNA_HUMAN	GLUL	241	175	68	77	45	69	128	139	101	62	67	36	323	206	297	248	245	273	86	5.89325e-14
G3P_HUMAN	GAPDH	1762	1440	1030	694	745	1190	521	484	425	573	561	1217	65	68	149	75	92	117	319	6.04436e-14
FLNC_HUMAN	FLNC	296	292	199	261	186	264	200	140	102	93	116	65	9	11	5	5	14	17	81	6.20342e-14
ENOB_HUMAN	ENO3	693	729	524	403	438	793	164	151	98	175	182	371	0	5	1	5	1	9	140	6.37108e-14
EF1A2_HUMAN	EEF1A2	580	340	244	257	237	527	230	196	133	205	233	421	7	1	0	2	3	4	136	6.54806e-14
ECHB_HUMAN	HADHB	64	55	69	117	88	144	164	274	146	267	227	393	16	34	44	34	46	46	66	6.73514e-14
DESM_HUMAN	DES	1297	1008	859	685	660	881	696	655	497	498	566	1027	83	16	1	8	10	30	262	6.93324e-14
DCBD2_HUMAN	DCBLD2	5	30	5	9	10	98	90	131	86	107	84	361	13	53	36	29	24	29	32	7.14333e-14
CTL2_HUMAN	SLC44A2	51	48	28	66	35	85	100	103	160	364	141	245	32	18	23	17	18	28	46	7.36656e-14
CSRP3_HUMAN	CSRP3	63	44	21	42	39	42	197	122	122	180	116	306	0	2	1	6	8	3	52	7.60419e-14
CSDE1_HUMAN	CSDE1	267	230	171	220	169	294	334	225	245	213	165	101	121	102	132	125	130	153	101	7.85767e-14
CRYAB_HUMAN	CRYAB	98	39	46	56	66	32	121	104	101	116	116	301	5	45	117	73	46	39	46	8.12862e-14
COX41_HUMAN	COX4I1	104	76	77	60	32	94	176	162	94	136	142	361	33	31	43	8	17	25	49	8.41893e-14
COX2_HUMAN	MT-CO2	1079	491	286	414	322	865	2115	1578	1851	2239	1491	3534	124	116	87	49	41	106	458	8.73074e-14
CO4A1_HUMAN	COL4A1	6	17	2	11	9	7	27	104	31	41	52	18	135	406	207	241	212	125	49	9.06654e-14
CO3A1_HUMAN	COL3A1	10	14	0	5	1	2	12	86	15	28	30	5	181	749	399	250	322	414	79	9.4292e-14
CLIC5_HUMAN	CLIC5	44	54	52	75	36	126	110	146	89	141	168	37	20	34	19	15	27	13	36	9.82208e-14
CD81_HUMAN	CD81	14	13	22	13	16	19	98	91	86	119	148	229	59	66	72	47	53	50	26	1.02491e-13
CCND2_HUMAN	CCND2	3	1	0	0	7	0	109	36	13	16	15	26	25	9	4	8	8	22	6	1.0715e-13
CALU_HUMAN	CALU	14	14	14	24	6	15	127	51	41	65	58	20	52	44	48	43	40	37	30	1.12252e-13
CACP_HUMAN	CRAT	60	59	62	69	72	108	57	78	44	112	105	179	21	39	41	34	55	31	34	1.17865e-13
BASI_HUMAN	BSG	26	29	53	58	72	61	146	169	147	164	223	392	37	75	108	69	60	46	61	1.24068e-13
ATP8_HUMAN	MT-ATP8	306	62	54	30	71	61	251	201	514	145	161	93	41	16	8	6	10	8	61	1.30961e-13
ATD2B_HUMAN	ATAD2B	1	8	2	0	6	30	6	38	4	3	2	138	0	7	0	0	2	4	11	1.38665e-13
AT2A2_HUMAN	ATP2A2	332	186	275	395	247	406	1628	1656	1590	2877	2347	1199	49	35	24	29	35	49	435	1.47331e-13
AT2A1_HUMAN	ATP2A1	2402	2659	2090	2154	1660	4501	5	51	11	9	5	124	7	5	4	2	2	45	541	1.57153e-13
AT1A1_HUMAN	ATP1A1	2	0	4	10	1	7	184	198	225	330	336	189	56	30	40	32	41	68	46	1.68379e-13
CTNA1_HUMAN	CTNNA1	26	13	16	16	17	17	280	214	170	301	266	172	24	35	33	14	21	48	50	1.69466e-13
MLTK_HUMAN		136	176	176	253	175	222	142	166	147	172	109	59	27	18	20	9	16	27	61	1.71347e-13
ASPP1_HUMAN	PPP1R13B	36	14	15	30	13	40	79	34	43	192	89	73	12	7	5	3	9	7	30	1.81331e-13
ARHL1_HUMAN	ADPRHL1	3	10	5	5	7	8	115	105	118	85	108	242	3	1	0	0	0	0	28	1.96442e-13
AQP1_HUMAN	AQP1	39	35	31	32	19	29	117	111	68	36	35	59	28	52	51	32	21	26	21	2.143e-13
CRIP2_HUMAN	CRIP2	2	5	1	2	0	6	88	157	91	75	76	184	11	15	9	6	9	18	25	2.16055e-13
ANKR1_HUMAN	ANKRD1	63	15	17	46	27	33	539	405	298	494	300	863	1	0	0	0	0	1	98	2.3573e-13
ZN720_HUMAN	ZNF720	1785	2204	781	813	568	3342	2029	1702	2313	1891	2737	1734	1203	1126	976	674	917	980	859	2.58099e-13
TPM1_HUMAN	TPM1	1237	1036	867	873	776	1644	1403	991	1160	1063	1066	1506	55	29	17	23	31	54	376	2.59996e-13
TITIN_HUMAN	TTN	1407	2373	2381	1790	1379	2573	969	1344	1247	1182	802	606	12	5	0	2	2	29	550	2.61922e-13
ANF_HUMAN	NPPA	0	0	0	0	0	0	68	144	42	22	99	86	0	0	0	0	0	0	21	2.61922e-13
SRBS1_HUMAN	SORBS1	102	110	66	94	78	85	346	401	408	416	403	127	109	335	248	235	278	232	130	2.63877e-13
SMAD3_HUMAN	SMAD3	374	147	186	169	143	283	739	372	764	761	535	793	60	43	52	40	35	41	176	2.65861e-13
RYR2_HUMAN	RYR2	3	0	1	3	0	0	445	376	460	588	440	167	0	1	0	2	0	2	57	2.67875e-13
NU6M_HUMAN	MT-ND6	2414	1821	838	803	826	1980	5551	5024	6413	6591	4250	3794	525	480	145	184	208	212	1091	2.6992e-13
NU4M_HUMAN	MT-ND4	2038	1901	863	962	857	1916	3770	5113	4345	5005	2968	4963	360	491	213	151	174	281	996	2.71996e-13
NU2M_HUMAN	MT-ND2	4626	2377	986	904	1046	2809	7165	6943	10531	8064	5643	10215	529	569	225	120	222	189	1560	2.74105e-13
MYPC3_HUMAN	MYBPC3	2	1	1	0	0	0	586	863	579	736	780	1030	0	0	0	0	0	1	158	2.76246e-13
MYH6_HUMAN	MYH6	498	150	105	76	59	144	5686	7415	9733	14863	14163	14796	76	45	25	14	17	21	2166	2.78421e-13
MLRV_HUMAN	MYL2	326	159	155	109	140	152	2071	1399	1712	1327	1495	2629	13	25	25	12	14	9	355	2.80631e-13
CYB_HUMAN	MT-CYB	2676	2209	677	825	631	2089	4495	5444	4851	4967	3074	7269	408	587	161	119	203	227	1137	2.82876e-13
COX3_HUMAN	MT-CO3	2055	1156	805	800	763	1214	2838	3907	3267	3012	2455	4050	275	261	195	58	120	150	801	2.85157e-13
COX1_HUMAN	MT-CO1	8061	4692	2643	2345	2119	5710	20595	16901	17440	17475	13695	14981	1252	1306	824	288	390	815	3515	2.87476e-13
CMYA5_HUMAN	CMYA5	459	528	534	662	446	709	469	378	479	547	370	167	7	0	0	0	0	5	179	2.89832e-13
ATPB_HUMAN	ATP5B	416	307	376	323	259	428	738	902	690	773	747	1172	45	98	155	111	110	109	236	2.92227e-13
PABP4_HUMAN	PABPC4	181	95	76	76	95	150	143	100	60	71	95	169	69	38	61	47	46	49	51	2.94067e-13
ATP6_HUMAN	MT-ATP6	8021	3244	993	928	1112	3657	10063	9296	14824	8765	7718	10923	1033	840	292	139	201	537	1979	2.94663e-13
AMD_HUMAN	PAM	6	7	10	11	7	13	167	226	183	205	196	75	19	28	16	32	25	39	46	2.94663e-13
ADT1_HUMAN	SLC25A4	321	318	374	378	331	454	688	568	480	679	728	848	5	6	4	5	2	12	197	2.97139e-13
ACTC_HUMAN	ACTC1	291	61	111	100	110	90	2628	2264	2366	2270	2295	3476	24	9	7	6	9	9	457	2.99657e-13
ALMS1_HUMAN	ALMS1	0	3	0	0	0	2	1	4	35	2	19	0	1	23	0	0	2	8	3	3.36757e-13
PSMD8_HUMAN	PSMD8	42	42	37	42	49	29	29	27	21	46	70	91	16	4	20	11	14	14	14	3.86827e-13
ALDOA_HUMAN	ALDOA	2204	2645	1737	1258	1183	2672	475	511	401	512	474	1079	55	90	96	79	92	98	514	3.92883e-13
AL1A2_HUMAN	ALDH1A2	50	2	1	0	3	1	60	4	17	7	18	0	7	8	7	11	11	5	11	4.7146e-13
NS1BP_HUMAN	IVNS1ABP	52	60	63	65	52	77	178	107	91	209	167	124	12	11	11	0	7	19	38	4.98055e-13
AES_HUMAN	AES	67	86	88	50	43	110	66	91	64	55	83	174	25	24	19	23	16	12	42	5.89325e-13
CPT1A_HUMAN	CPT1A	1	4	2	16	6	11	15	33	26	69	80	41	21	9	52	52	65	31	14	6.17873e-13
LMO7_HUMAN	LMO7	16	17	11	13	7	24	196	203	153	194	116	89	0	4	0	3	0	3	31	6.77325e-13
K0100_HUMAN	KIAA0100	45	53	38	59	19	69	95	77	82	113	121	33	24	54	35	52	63	45	35	7.00625e-13
ADCK3_HUMAN	CABC1	151	129	166	236	189	162	67	79	58	142	137	203	8	9	3	6	5	17	50	7.85767e-13
CPT1B_HUMAN	CPT1B	77	94	93	85	69	134	114	165	93	147	102	236	17	20	17	23	25	31	46	1.15093e-12
ACSL1_HUMAN	ACSL1	72	100	144	122	110	172	84	145	153	232	183	85	149	214	264	111	162	88	83	1.17865e-12
LGAT1_HUMAN	LPGAT1	32	6	16	13	12	22	76	42	61	59	61	10	20	26	41	40	33	33	15	1.26571e-12
RGS5_HUMAN	RGS5	22	13	17	34	19	27	86	105	67	60	61	20	35	44	25	17	23	37	24	1.3427e-12
CN180_HUMAN	C14orf180	0	0	0	0	0	0	36	23	28	21	43	94	3	19	13	14	21	20	9	1.53826e-12
AT5G2_HUMAN	ATP5G2	71	8	7	10	12	22	93	24	65	111	58	57	20	6	3	2	7	6	14	1.56279e-12
ERN1_HUMAN	ERN1	8	5	5	2	1	2	12	5	47	27	19	3	5	4	9	5	14	5	3	2.04808e-12
A4_HUMAN	APP	15	15	12	14	10	15	126	185	132	172	216	98	32	34	32	41	56	47	35	2.05033e-12
PRP8_HUMAN	PRPF8	23	25	19	34	35	34	67	57	40	88	71	15	53	57	31	40	43	54	24	2.06585e-12
ACADV_HUMAN	ACADVL	66	42	45	47	40	87	96	97	50	136	102	210	44	46	55	49	46	61	41	2.3573e-12
HSPB8_HUMAN	HSPB8	70	46	46	53	43	38	58	57	47	60	86	145	3	11	7	6	9	9	25	2.79158e-12
XIRP2_HUMAN	XIRP2	250	120	161	237	181	254	144	107	76	73	51	54	0	0	0	0	0	1	45	3.11722e-12
GRP75_HUMAN	HSPA9	83	64	52	92	69	97	164	135	121	210	217	115	32	37	45	49	62	39	46	3.20049e-12
PAIRB_HUMAN	SERBP1	79	62	45	45	43	116	112	94	102	220	119	169	39	28	36	14	38	42	54	4.69999e-12
CATD_HUMAN	CTSD	88	30	62	74	56	72	25	24	24	36	32	94	75	49	76	90	91	101	33	9.8578e-12

## Sheet: Sheet3
Uniprot gene	HGNC name	UQN Skeletal:April	UQN Skeletal:August	UQN Skeletal:October	UQN Skeletal:Torpor	UQN Skeletal:IBA	UQN Skeletal:March	UQN Heart:April	UQN Heart:August	UQN Heart:October	UQN Heart:Torpor	UQN Heart:IBA	UQN Heart:March	UQN WAT:April	UQN WAT:August	UQN WAT:October	UQN WAT:Torpor	UQN WAT:IBA	UQN WAT:March	UQN Unknown	WAT FDR < 10^(-11)
ZG16_HUMAN	ZG16	0	0	0	0	0	0	0	0	0	0	0	0	32	0	0	0	0	0	0	2.15191e-14
VIME_HUMAN	VIM	13	26	16	12	27	18	53	93	40	65	69	62	179	347	940	619	658	510	117	2.17112e-14
UBAC1_HUMAN	UBAC1	32	38	16	29	19	34	53	47	33	30	41	57	12	15	113	8	12	8	14	2.19068e-14
TSP1_HUMAN	THBS1	0	3	0	1	0	1	1	4	5	3	1	3	28	29	49	75	133	84	17	2.2106e-14
TRY3_HUMAN	PRSS3	0	0	7	0	0	1	0	0	0	0	0	0	577	0	0	0	2	0	18	2.23088e-14
TMM66_HUMAN	TMEM66	18	14	15	13	13	12	18	19	15	29	26	16	73	271	307	197	149	131	59	2.25154e-14
THRSP_HUMAN	THRSP	2	0	0	0	0	0	2	1	0	0	0	0	80	167	183	79	67	51	21	2.27258e-14
STAR_HUMAN	STAR	4	1	0	3	1	1	1	1	3	3	1	0	61	2	0	0	3	4	2	2.29402e-14
SRRM2_HUMAN	SRRM2	85	81	88	73	62	146	84	127	141	90	97	112	173	120	56	75	104	177	59	2.31587e-14
SRBS1_HUMAN	SORBS1	102	110	66	94	78	85	346	401	408	416	403	127	109	335	248	235	278	232	130	2.33813e-14
SPRC_HUMAN	SPARC	13	50	6	11	14	14	94	154	66	71	86	54	149	553	305	229	216	172	67	2.36083e-14
SEM3G_HUMAN	SEMA3G	4	3	1	2	1	2	9	11	4	4	9	3	8	72	83	61	66	25	13	2.38398e-14
RET_HUMAN	RET	0	0	1	1	0	0	0	4	0	1	1	0	1	55	21	29	10	8	2	2.40758e-14
PTRF_HUMAN	PTRF	25	33	16	27	23	40	73	92	66	62	58	72	141	440	527	314	369	237	97	2.43166e-14
PTGR1_HUMAN	PTGR1	4	1	2	0	0	3	5	3	1	6	1	2	7	49	60	69	96	55	17	2.45622e-14
PLPL2_HUMAN	PNPLA2	115	117	120	175	143	191	172	191	173	273	264	723	259	511	813	628	693	288	168	2.48129e-14
PLIN4_HUMAN	PLIN4	46	76	98	87	66	82	76	109	123	122	93	75	240	755	816	684	892	575	141	2.50687e-14
PEA15_HUMAN	PEA15	7	1	2	5	1	5	21	16	13	11	18	18	37	157	192	117	122	71	28	2.53298e-14
PDK4_HUMAN	PDK4	226	275	135	558	471	391	186	355	88	705	533	426	52	105	77	239	329	274	219	2.55964e-14
PCKGC_HUMAN	PCK1	0	1	0	0	0	0	0	7	3	1	1	2	33	134	169	212	248	175	22	2.58687e-14
PAG16_HUMAN	PLA2G16	9	12	28	34	17	27	4	9	8	5	6	11	52	96	213	137	140	99	31	2.61469e-14
PABP1_HUMAN	PABPC1	11	17	9	3	12	11	49	56	50	57	35	37	268	103	132	96	131	142	34	2.64311e-14
NU6M_HUMAN	MT-ND6	2414	1821	838	803	826	1980	5551	5024	6413	6591	4250	3794	525	480	145	184	208	212	1091	2.67215e-14
NU4M_HUMAN	MT-ND4	2038	1901	863	962	857	1916	3770	5113	4345	5005	2968	4963	360	491	213	151	174	281	996	2.70184e-14
NU2M_HUMAN	MT-ND2	4626	2377	986	904	1046	2809	7165	6943	10531	8064	5643	10215	529	569	225	120	222	189	1560	2.7322e-14
NU1M_HUMAN	MT-ND1	2596	2420	1133	1243	987	2687	3512	5548	4548	4019	3095	8219	355	404	121	158	161	241	1050	2.76325e-14
NNAT_HUMAN	NNAT	4	1	0	7	1	3	4	4	1	5	2	3	32	127	160	130	145	178	25	2.79501e-14
NECP2_HUMAN	NECAP2	3	1	11	2	3	3	6	4	3	4	4	7	403	3	4	15	9	8	12	2.82751e-14
MYH4_HUMAN	MYH4	3731	5482	1442	1847	2025	5831	40	4	46	58	30	3	29	1	0	9	1	31	670	2.86078e-14
MYH1_HUMAN	MYH1	1903	4675	6683	4642	3416	6756	71	37	48	178	56	106	11	3	5	6	5	81	1001	2.89483e-14
MYH11_HUMAN	MYH11	17	25	11	16	9	14	25	34	35	16	13	16	187	73	9	18	18	45	24	2.92971e-14
MFAP4_HUMAN	MFAP4	0	2	1	2	0	1	8	21	18	12	9	7	13	73	115	52	60	29	16	2.96544e-14
MAP1B_HUMAN	MAP1B	1	2	2	1	0	1	8	7	21	11	14	3	11	139	76	96	60	43	18	3.00205e-14
LIPS_HUMAN	LIPE	6	4	6	15	23	7	7	18	8	19	14	44	217	376	629	536	508	355	73	3.03958e-14
LIPR2_HUMAN	PNLIPRP2	0	0	0	0	0	0	0	0	0	0	0	0	65	0	0	0	0	0	3	3.07805e-14
LIPR1_HUMAN	PNLIPRP1	0	0	4	0	0	0	0	0	0	0	0	0	192	0	0	0	0	0	2	3.11751e-14
LIPP_HUMAN	PNLIP	0	0	9	0	0	1	138	114	183	224	204	306	631	52	45	50	62	107	66	3.158e-14
CAV1_HUMAN	CAV1	13	21	24	21	19	27	66	77	77	122	61	104	77	235	179	146	144	115	46	3.1695e-14
LIPL_HUMAN	LPL	88	45	64	68	48	82	369	367	298	270	267	156	781	976	516	282	430	344	188	3.19955e-14
LEP_HUMAN	LEP	0	0	0	0	0	0	0	0	0	0	0	0	5	163	227	84	95	35	12	3.24221e-14
LAMP2_HUMAN	LAMP2	13	13	14	21	25	23	29	27	25	54	31	13	111	44	20	30	21	37	18	3.28603e-14
IVD_HUMAN	IVD	11	16	14	6	12	11	36	52	40	17	15	16	71	12	16	15	9	24	12	3.33104e-14
ITB1_HUMAN	ITGB1	18	21	25	23	9	21	66	101	77	102	77	34	67	213	324	215	232	163	41	3.37731e-14
INMT_HUMAN	INMT	4	5	4	9	9	1	19	9	11	10	19	10	40	90	288	105	151	119	20	3.42487e-14
UBB_HUMAN		76	87	71	73	52	54	110	120	98	111	112	167	56	80	119	169	114	100	38	3.437e-14
IF4B_HUMAN	EIF4B	207	83	78	89	88	119	200	97	239	179	255	86	187	74	128	93	119	86	93	3.4738e-14
IBP5_HUMAN	IGFBP5	34	36	11	9	10	74	97	55	22	27	26	21	240	66	79	49	49	95	35	3.52414e-14
IBP4_HUMAN	IGFBP4	5	2	5	4	3	1	7	11	5	3	5	5	49	78	181	81	117	84	16	3.57597e-14
HSPB6_HUMAN	HSPB6	394	258	248	196	205	404	702	561	494	526	574	1178	17	112	120	46	62	35	198	3.62934e-14
HSPB1_HUMAN	HSPB1	86	85	76	53	68	50	54	99	53	37	74	171	5	48	107	43	36	22	41	3.68433e-14
HMCS2_HUMAN	HMGCS2	44	9	12	65	56	33	3	3	1	12	17	23	51	52	147	142	197	141	25	3.74102e-14
GPX5_HUMAN	GPX5	0	0	0	0	0	0	0	0	0	0	0	0	0	0	0	0	0	43	1	3.79947e-14
GPDA_HUMAN	GPD1	57	100	57	56	30	171	9	31	16	14	15	18	285	599	568	419	462	339	102	3.85978e-14
GP2_HUMAN	GP2	0	0	2	1	0	0	2	1	1	1	0	3	123	1	5	3	1	0	4	3.92203e-14
FZD4_HUMAN	FZD4	13	13	16	12	3	10	21	32	26	22	19	3	63	129	157	189	210	153	31	3.98633e-14
FRIL_HUMAN	FTL	39	21	17	21	19	22	36	41	35	38	44	94	328	288	523	303	348	444	96	4.05277e-14
FHL1_HUMAN	FHL1	243	418	365	284	273	287	76	42	40	116	82	75	71	196	397	258	295	167	92	4.12146e-14
FCN1_HUMAN	FCN1	2	0	0	0	0	0	1	1	0	0	0	2	252	6	7	5	8	75	9	4.19252e-14
FAS_HUMAN	FASN	0	4	2	1	1	1	4	4	2	8	4	7	60	193	141	75	71	62	24	4.26607e-14
FADS3_HUMAN	FADS3	13	11	19	18	16	6	56	49	60	36	38	109	37	195	405	332	318	125	58	4.34225e-14
FABP4_HUMAN	FABP4	33	27	24	45	17	49	100	100	64	119	105	50	836	2374	2264	1816	1845	1405	329	4.4212e-14
F263_HUMAN	PFKFB3	11	15	9	0	1	4	3	4	2	2	2	0	65	111	155	151	202	100	24	4.50307e-14
F16B2_HUMAN	FAM160B2	9	12	17	13	6	14	16	12	18	14	35	36	13	17	112	12	17	11	7	4.58804e-14
EHD2_HUMAN	EHD2	13	7	6	12	7	14	23	29	20	19	28	28	77	198	227	133	166	106	23	4.67627e-14
EF1A1_HUMAN	EEF1A1	82	60	46	69	51	90	526	467	422	396	382	478	1321	781	1091	666	916	1113	307	4.76796e-14
DGAT2_HUMAN	DGAT2	13	10	15	10	7	14	24	29	16	24	26	50	243	441	408	276	263	130	49	4.86332e-14
DESM_HUMAN	DES	1297	1008	859	685	660	881	696	655	497	498	566	1027	83	16	1	8	10	30	262	4.96257e-14
DDRGK_HUMAN	DDRGK1	4	5	1	2	4	5	5	7	14	4	5	7	9	144	77	70	65	47	20	5.06596e-14
CYTC_HUMAN	CST3	69	56	61	85	62	61	44	55	50	57	78	115	91	131	380	232	263	123	59	5.17374e-14
CYB_HUMAN	MT-CYB	2676	2209	677	825	631	2089	4495	5444	4851	4967	3074	7269	408	587	161	119	203	227	1137	5.28622e-14
CTRL_HUMAN	CTRL	0	0	1	0	0	0	0	0	0	0	0	0	185	0	0	0	0	0	9	5.40369e-14
CTRC_HUMAN	CTRC	0	0	2	0	0	0	0	0	0	0	0	0	261	0	0	0	0	0	3	5.5265e-14
CTRB2_HUMAN	CTRB2	0	0	1	0	0	0	0	1	0	0	0	0	108	0	0	0	0	0	2	5.65502e-14
CTRB1_HUMAN	CTRB1	0	0	0	0	1	0	0	0	0	0	1	0	61	0	0	0	0	0	7	5.78967e-14
CRYAB_HUMAN	CRYAB	98	39	46	56	66	32	121	104	101	116	116	301	5	45	117	73	46	39	46	5.93088e-14
CP2F1_HUMAN	CYP2F1	0	1	1	1	0	0	0	2	1	0	1	0	89	43	64	17	16	33	6	6.07915e-14
COX3_HUMAN	MT-CO3	2055	1156	805	800	763	1214	2838	3907	3267	3012	2455	4050	275	261	195	58	120	150	801	6.23503e-14
COX1_HUMAN	MT-CO1	8061	4692	2643	2345	2119	5710	20595	16901	17440	17475	13695	14981	1252	1306	824	288	390	815	3515	6.39911e-14
COL_HUMAN	CLPS	0	0	0	0	0	0	0	0	0	0	0	0	68	0	0	0	0	0	6	6.57205e-14
COFA1_HUMAN	COL15A1	3	6	1	2	0	1	10	20	5	11	20	3	53	172	123	104	83	47	28	6.75461e-14
CO5A3_HUMAN	COL5A3	1	2	2	2	3	8	2	8	5	10	2	7	35	291	243	157	151	115	23	6.9476e-14
CO4A2_HUMAN	COL4A2	9	16	5	17	7	8	52	107	48	71	74	72	84	276	168	157	199	131	50	7.15194e-14
CO4A1_HUMAN	COL4A1	6	17	2	11	9	7	27	104	31	41	52	18	135	406	207	241	212	125	49	7.36867e-14
CO3_HUMAN	C3	0	1	4	3	3	8	12	18	12	14	14	5	112	33	69	107	73	111	16	7.59894e-14
CO3A1_HUMAN	COL3A1	10	14	0	5	1	2	12	86	15	28	30	5	181	749	399	250	322	414	79	7.84406e-14
CO1A2_HUMAN	COL1A2	0	27	2	3	1	3	28	61	18	30	46	21	91	317	221	155	184	205	52	8.10553e-14
CO1A1_HUMAN	COL1A1	4	36	2	0	6	3	17	61	9	23	32	10	72	253	176	134	200	216	44	8.38503e-14
CIDEC_HUMAN	CIDEC	0	0	2	12	1	1	0	2	2	2	2	2	109	662	1153	859	742	479	121	8.6845e-14
CH3L1_HUMAN	CHI3L1	0	0	0	0	1	1	0	0	0	0	0	0	12	5	27	38	50	77	10	9.00615e-14
CEL_HUMAN	CEL	0	0	0	0	0	0	0	0	0	0	0	0	171	0	0	0	0	0	7	9.35254e-14
CEL3B_HUMAN	CELA3B	0	1	0	0	0	0	0	0	0	0	0	0	396	0	0	0	0	0	6	9.72664e-14
CEL2A_HUMAN	CELA2A	0	0	2	0	0	1	1	1	1	1	0	0	121	0	0	0	0	0	4	1.01319e-13
CD36_HUMAN	CD36	49	38	45	43	38	77	189	168	165	209	158	107	184	462	268	242	270	217	102	1.05724e-13
CD151_HUMAN	CD151	8	2	5	12	16	9	31	35	31	37	43	20	61	37	201	130	106	81	31	1.1053e-13
CBPB1_HUMAN	CPB1	0	0	0	0	0	0	0	0	0	0	0	0	139	0	1	0	0	0	4	1.15793e-13
CBPA2_HUMAN	CPA2	0	0	1	0	0	0	0	0	0	0	0	0	183	0	0	0	0	0	6	1.21583e-13
CBPA1_HUMAN	CPA1	0	0	1	0	0	0	0	0	0	0	0	0	325	1	0	0	1	0	2	1.27982e-13
CAH3_HUMAN	CA3	223	267	154	56	51	189	5	3	3	1	1	5	1056	666	679	546	710	1335	201	1.35092e-13
MYH6_HUMAN	MYH6	498	150	105	76	59	144	5686	7415	9733	14863	14163	14796	76	45	25	14	17	21	2166	1.36257e-13
CAC1B_HUMAN	CACNA1B	0	1	0	0	0	1	1	3	2	2	0	0	37	118	145	171	135	119	26	1.43039e-13
ATP6_HUMAN	MT-ATP6	8021	3244	993	928	1112	3657	10063	9296	14824	8765	7718	10923	1033	840	292	139	201	537	1979	1.51979e-13
AT2A1_HUMAN	ATP2A1	2402	2659	2090	2154	1660	4501	5	51	11	9	5	124	7	5	4	2	2	45	541	1.62111e-13
AT1A2_HUMAN	ATP1A2	187	222	243	278	221	353	18	24	16	20	14	18	57	14	16	27	22	92	81	1.7369e-13
XDH_HUMAN	XDH	1	0	0	0	0	0	7	3	0	0	0	2	72	29	33	23	11	66	7	1.79115e-13
ASB2_HUMAN	ASB2	39	103	141	96	64	46	205	223	238	285	294	375	3	39	57	44	47	9	66	1.87051e-13
ARHG8_HUMAN	NET1	2	6	0	4	0	4	8	17	5	14	6	15	69	17	11	18	18	51	10	2.02638e-13
AOC3_HUMAN	AOC3	7	13	2	4	0	10	4	23	11	8	13	7	96	263	207	172	178	85	31	2.2106e-13
NID1_HUMAN	NID1	4	10	9	5	1	7	27	44	14	29	37	8	28	126	109	94	134	87	33	2.32581e-13
ANXA8_HUMAN	ANXA8	0	0	0	0	3	0	1	5	2	2	2	0	13	88	172	181	235	70	17	2.43166e-13
ANXA2_HUMAN	ANXA2	7	3	5	6	3	5	12	20	5	10	20	16	31	134	156	195	184	87	38	2.70184e-13
SPD2A_HUMAN	SH3PXD2A	10	7	1	2	7	9	15	19	13	7	4	2	65	48	33	56	68	135	20	2.81619e-13
AHNK2_HUMAN	AHNAK2	0	0	2	0	0	1	0	1	15	1	0	0	33	24	9	0	2	3	0	2.95115e-13
CO5A1_HUMAN	COL5A1	3	10	2	2	6	5	6	44	11	16	13	8	31	151	103	85	88	72	15	3.02176e-13
AMY2B_HUMAN	AMY2B	13	3	1	3	0	1	2	2	1	1	0	2	825	6	4	0	3	3	19	3.03958e-13
ALBU_HUMAN	ALB	8	0	0	0	3	0	4	3	8	4	1	0	3	4	87	0	1	2	3	3.4738e-13
AHNK_HUMAN	AHNAK	76	81	87	140	97	117	135	143	125	131	123	75	145	347	331	357	380	355	100	4.05277e-13
ADR2_HUMAN	ADIPOR2	22	14	11	19	22	20	29	27	40	49	53	15	127	261	229	294	287	220	83	4.86332e-13
VCAM1_HUMAN	VCAM1	0	1	0	0	0	1	3	5	5	4	4	10	11	16	40	66	60	49	6	5.71676e-13
ADAM7_HUMAN	ADAM7	0	0	0	0	0	0	0	0	0	0	0	0	0	2	0	0	0	50	0	6.07915e-13
TUSC5_HUMAN	TUSC5	0	1	1	0	0	0	0	2	0	0	1	0	65	37	24	69	93	95	12	6.3685e-13
ACTS_HUMAN	ACTA1	3720	4097	4460	3341	2950	7418	122	98	98	150	76	180	25	4	5	0	4	82	787	8.10553e-13
RNAS1_HUMAN	RNASE1	0	0	1	0	0	0	0	0	0	0	0	0	21	0	0	0	0	0	0	9.02959e-13
ACSL1_HUMAN	ACSL1	72	100	144	122	110	172	84	145	153	232	183	85	149	214	264	111	162	88	83	1.21583e-12
ENOA_HUMAN	ENO1	7	13	9	10	4	7	24	40	24	30	53	39	12	72	93	67	70	47	28	2.32113e-12
LRP1_HUMAN	LRP1	8	14	9	6	10	9	22	26	37	30	39	8	224	191	219	317	298	268	52	2.41938e-12
ACOD_HUMAN	SCD	7	38	14	14	12	4	29	62	29	23	25	10	1137	8313	7387	4561	4199	2560	942	2.43166e-12
T22D3_HUMAN	TSC22D3	78	61	26	21	13	20	14	49	15	23	18	16	51	120	121	47	64	43	15	3.62225e-12
GELS_HUMAN	GSN	30	80	58	45	27	41	52	128	81	103	124	119	163	175	328	236	211	227	79	3.7917e-12
1433T_HUMAN	YWHAQ	3	4	4	3	1	4	18	35	18	29	34	18	88	170	193	172	191	104	31	5.22061e-12
COX2_HUMAN	MT-CO2	1079	491	286	414	322	865	2115	1578	1851	2239	1491	3534	124	116	87	49	41	106	458	5.25698e-12
CPT1A_HUMAN	CPT1A	1	4	2	16	6	11	15	33	26	69	80	41	21	9	52	52	65	31	14	5.26241e-12
PARPT_HUMAN	TIPARP	3	5	2	4	0	5	14	18	14	10	18	11	5	30	73	49	40	45	13	5.63954e-12
